# Supplementary material
Source: MDPI journal article supplement (https://www.mdpi.com/1999-4907/13/5/788)
Supplement: s1 [file s1]

## Supplementary materials

**Table S1** Basic information for the alpine treeline sites located in the TP. Codes were used to represent different tree species forming the treeline (Species): S0, *Larix potaninii* var. *macrocarpa* Law; S1, *Abies georgei* Orr. *smithii*; S2, *Abies fabri*; S3, *Abies faxoniana* Rehd.; S4, *Abies georgei* var. *smithii*; S5, *Sabina saltuaria*; S6, *Picea likiangensis* (Franch) Pritz var. *balfouriana*; S7, *Sabina tibetica* Kom; S8, *Juniperus przewalkii* Kom.; S9, *Picea crassifolia* Kom.; S10, *Abies squamata*; S11, *Betul utilis* D. Don; S12, *Abies spectabilis*; S13, *Pinus wallichiana*. Magnitude of treeline advance over last century (Magnitude). Values of 0, 0.5 and 1 represent absence of disturbance, low-intensity disturbance and high-intensity disturbance, respectively. Research methods include field plot survey (FS) and remote sensing (RS). The eight subareas include Hengduan Mountains (HD), Chuangxi region (CX), Linzhi region (LZ), Changdu-Naqu region (CDN), Yushu region (YS), Haixi-Hainan region (HXN), Qilian Mountains (QL), Himalaya Mountains (HM).

| Site | subarea | Species | Slope (°) | Elevation<br>(m a.s.l.) | Magnitude<br>(m) | Disturbance   | Methods | References        |
|------|---------|---------|-----------|-------------------------|------------------|---------------|---------|-------------------|
| BM1  | HD      | S0      | 19        | 4417                    | 91.2             | 1 (Fire)      | FS      | Wang et al.2019   |
| BM2  | HD      | S0      | 19        | 4387                    | 45               | 1 (Fire)      | FS      | Wang et al.2019   |
| BM3  | HD      | S1      | 15        | 4247                    | 28.1             | 0             | FS      | Wang et al.2019   |
| BM4  | HD      | S1      | 22        | 4397                    | 18.7             | 0             | FS      | Liang et al.2016  |
| BM5  | HD      | S1      | 26        | 4398                    | 19.5             | 0             | FS      | Liang et al.2016  |
| BM6  | HD      | S1      | 25        | 4428                    | 0                | 0             | FS      | Liang et al.2016  |
| BM7  | HD      | S5      | 28        | 4394                    | 0                | 1 (grazing)   | FS      | Zhang et al.2007  |
| BM8  | HD      | S0      | 19        | 4359                    | 12               | 1 (Fire)      | FS      | Wang et al.2019   |
| GG1  | CX      | S2      | 42        | 3647                    | 16.3             | 0.5 (grazing) | FS      | Ran et al.2014    |
| GG2  | CX      | S2      | 40        | 3622                    | 5.1              | 0.5 (grazing) | FS      | Ran et al.2014    |
| GG3  | CX      | S2      | 37        | 3641                    | 9.2              | 0.5 (grazing) | FS      | Ran et al.2014    |
| GG4  | CX      | S2      | 38        | 3765                    | 0                | 0.5 (grazing) | FS      | Ran et al.2014    |
| GG5  | CX      | S2      | 22        | 3780                    | 2.3              | 0.5 (grazing) | FS      | Ran et al.2014    |
| GG6  | CX      | S2      | 31        | 3802                    | 0.7              | 0.5 (grazing) | FS      | Ran et al.2014    |
| AB1  | CX      | S0      | 35        | 4076                    | 16.9             | 0             | FS      | Cui et al.2017    |
| AB2  | CX      | S3      | 28        | 3968                    | 0                | 0             | FS      | Cui et al.2017    |
| LZ1  | LZ      | S4      | 13        | 4360                    | 0.3              | 0             | FS      | Liang et al. 2011 |
| LZ2  | LZ      | S4      | 10        | 4388                    | 0                | 0             | FS      | Liang et al. 2011 |
| LZ3  | LZ      | S4      | 15        | 4378                    | 9.1              | 0             | FS      | Liang et al. 2011 |
| LZ4  | LZ      | S4      | 15        | 4370                    | 2                | 0             | FS      | Wang et al.2017   |
| LZ5  | LZ      | S5      | 12        | 4520                    | 0                | 0             | FS      | Liu et al.2011    |
| RW1  | CDN     | S4      | 30        | 4471.3                  | 3.6              | 0             | FS      | Liang et al.2016  |
| RW2  | CDN     | S4      | 33        | 4447.8                  | 5.4              | 0             | FS      | Liang et al.2016  |
| RW3  | CDN     | S6      | 27        | 4478.3                  | 68.5             | 0             | FS      | Liang et al.2016  |
| BS   | CDN     | S7      | 28        | 4900                    | 0                | 0             | FS      | Miche et al.2007  |
| CD1  | CDN     | S6      | 36        | 4299                    | 0                | 0             | FS      | Lyu et al. 2016   |
| CD2  | CDN     | S6      | 43        | 4319                    | 0                | 0             | FS      | Lyu et al. 2016   |
| CD3  | CDN     | S6      | 30        | 4308                    | 0                | 0             | FS      | Lyu et al. 2016   |
| CD4  | CDN     | S6      | 38        | 4472                    | 25               | 0             | FS      | Lyu et al. 2016   |
| CD5  | CDN     | S6      | 37        | 4450                    | 0                | 0             | FS      | Lyu et al. 2016   |
| CD6  | CDN     | S6      | 35        | 4463                    | 23               | 0             | FS      | Lyu et al. 2016   |
| SX   | CDN     | S7      | 31        | 4460                    | 0                | 0             | FS      | Zhang et al.2018  |

|      |     |     |    |        |      |             |         |                   |
|------|-----|-----|----|--------|------|-------------|---------|-------------------|
| YS1  | YS  | S6  | 28 | 4195   | 64.6 | 0           | FS      | Liang et al.,2016 |
| YS2  | YS  | S7  | 26 | 4458   | 0    | 1 (grazing) | FS      | Unpublished data  |
| HBS  | HXN | S8  | 12 | 3730   | 0    | 0           | FS      | Fang et al.2009   |
| DLH  | HXN | S8  | 20 | 4034   | 0    | 0           | FS      | Shao et al.2004   |
| WL1  | HXN | S9  | 20 | 4034   | 13.2 | 0           | FS      | Liang et al.2016  |
| WL2  | HXN | S9  | 27 | 3877   | 53.6 | 0           | FS      | Liang et al.2016  |
| DL1  | HXN | S8  | 18 | 4200   | 0    | 0           | FS      | Wang et al.2017   |
| QL1  | QL  | S9  | 33 | 3385.8 | 51.5 | 0           | FS      | Liang et al.2016  |
| QL2  | QL  | S9  | 37 | 3496   | 79.9 | 0           | FS      | Liang et al.2016  |
| QL3  | QL  | S9  | 24 | 3318   | 0    | 0           | FS      | Wang et al.2017   |
| QL4  | QL  | S9  | 31 | 3680   | 0    | 0           | FS      | Wang et al.2017   |
| QL5  | QL  | S9  | 32 | 3700   | 0    | 0           | FS      | Wang et al.2017   |
| KD1  | CX  | S2  | 28 | 4380   | 75   | 0           | FS      | Zhou et al.2019   |
| KD2  | CX  | S10 | 25 | 4520   | 40   | 0           | FS      | Zhou et al.2019   |
| KCA1 | HM  | S11 | 30 | 4217.2 | 29.5 | 0           | FS      | Sigdel et al.2018 |
| KCA2 | HM  | S11 | 33 | 3931.4 | 51.7 | 0           | FS      | Sigdel et al.2018 |
| EV1  | HM  | S11 | 26 | 4097   | 14.6 | 0           | FS      | Sigdel et al.2018 |
| EV2  | HM  | S12 | 39 | 4133   | 75.3 | 0           | FS      | Sigdel et al.2018 |
| LT1  | HM  | S11 | 30 | 4031.3 | 16.1 | 0           | FS      | Sigdel et al.2018 |
| LT2  | HM  | S12 | 35 | 4067.4 | 11.4 | 1           | FS      | Sigdel et al.2018 |
| MST1 | HM  | S12 | 25 | 3600   | 31.7 | 0           | FS      | Sigdel et al.2018 |
| MST2 | HM  | S11 | 20 | 3950   | 23.3 | 0           | FS      | Sigdel et al.2018 |
| MA   | HM  | S11 | 39 | 4076.3 | 11.1 | 0           | FS      | Sigdel et al.2018 |
| JM   | HM  | S11 | 32 | 3872.6 | 5.5  | 0           | FS      | Sigdel et al.2018 |
| HL1  | HM  | S11 | 28 | 4222.5 | 16.3 | 0           | FS      | Sigdel et al.2018 |
| HL2  | HM  | S11 | 43 | 4050.8 | 14.8 | 0           | FS      | Sigdel et al.2018 |
| SA1  | HM  | S13 | 35 | 3563   | 124  | 0           | RS & FS | Dubey et al.2003  |

## References

- Cui, J.; Qin, J.; Sun, H. Population spatial dynamics of *Larix Potaninii* in alpine treeline ecotone in the eastern margin of the Tibetan Plateau, China. *Forests* **2017**, *8*, 356. doi:10.3390/F8100356.
- Dubey, B.; Yadav, R.R.; Singh, J.; Chaturvedi, R. Upward shift of Himalayan pine in Western Himalaya, India. *Curr. Sci.* **2003**, *85*, 1135-1136.
- Fang, K.; Gou, X.; Chen, F.; Peng, J.; D'Arrigo, R.; Wright, W.; Li, M.H. Response of regional tree-line forests to climate change: Evidence from the northeastern Tibetan Plateau. *Trees* **2009**, *23*, 1321-1329, doi:10.1007/S00468-009-0373-5.
- Liang, E.; Wang, Y.; Eckstein, D.; Luo, T. Little change in the fir tree-line position on the southeastern Tibetan Plateau after 200 years of warming. *New. Phytol.* **2011**, *190*, 760-769, doi:10.1111/J.1469-8137.2010.03623.X.
- Liang, E.; Wang, Y.; Piao, S.; Lu, X.; Camarero, J.J.; Zhu, H.; Zhu, L.; Ellison, A.M.; Ciais, P.; Peñuelas, J. Species interactions slow warming-induced upward shifts of treelines on the Tibetan Plateau. *P. Natl. Acad. Sci. USA* **2016**, *113*, 4380-4385, doi:10.1073/PNAS.1520582113.
- Liu, B.; Liang, E.; Zhu, L. Microclimatic conditions for *Juniperus saltuaria* treeline in the Sygera Mountains, southeastern 360 Tibetan Plateau. *Mt. Res. Dev.* **2011**, *31*, 45-53, doi:10.1659/MRD-JOURNAL-D-10-00096.1.
- Lyu, L.; Zhang, Q.; Deng, X.; Mäkinen, H. Fine-scale distribution of treeline trees and the nurse plant facilitation on the eastern Tibetan Plateau. *Ecol. Indic.* **2016**, *66*, 251-258, doi:10.1016/J.ECOLIND.2016.01.041.
- Ran, F.; Liang, Y.; Yang, Y.; Wang, G. Spatial-temporal dynamics of an *Abies fabri* population near the alpine treeline in the Yajiangeng area of Gongga Mountains, China. *Acta Ecol. Sin.* **2014**, *34*, 6872-6878, doi: 10.5846/STXB201311252809.

- Shao, X.; Huang, L.; Liu, H.; Liang, E.; Fang, X.; Wang, L. Precipitation changes recorded in tree ring over the last 1000 years in the Delingha region of Qinghai province. *Sci. China. SerD-Earth. Sci.* **2004**, *34*, 145-153, doi: 10.3321/j.issn:1006-9267.2004.02.007.
- Sigdel, S.R.; Wang, Y.; Camarero, J.J.; Zhu, H.; Liang, E.; Peñuelas, J. Moisture-mediated responsiveness of treeline shifts to global warming in the Himalayas. *Glob. Chang. Biol.* **2018**, *24*, 5549-5559, doi:10.1111/GCB.14428.
- Wang, Y.; Case, B.; Lu, X.; Ellison, A.M.; Peñuelas, J.; Zhu, H.; Liang, E.; Camarero, J.J. Fire facilitates warming-induced upward shifts of alpine treelines by altering interspecific interactions. *Trees* **2019**, *33*, 1051-1061, doi:10.1007/S00468-019-01841-6.
- Wang, Y.; Liang, E.; Sigdel, S.R.; Liu, B.; Camarero, J.J. The coupling of treeline elevation and temperature is mediated by non-thermal factors on the Tibetan Plateau. *Forests* **2017**, *8*, 109, doi:10.3390/F8040109.
- Zhang, Q.; Zhang, Y.; Luo, P.; Wang, Q.; Wu, N. Ecological characteristics of a *Sabina saltuaria* population at timberline on the south facing slope of Baima Snow mountain, southwest China. *Chinese. J. Plant Ecol.* 2007, **31**, 857-864, doi: 10.17521/CJPE.2007.0108.

**Table S2** Location of CRU 0.5° gridded data near the study treeline sites. The climatic variables include: annual/Summer/winter mean minimum temperature changes, annual/summer/winter precipitation changes since 1901. The CRU data was from CRU TS4.01 database. Climatic variables included annual, summer, and winter mean minimum temperature (CAT, CWT, CST) and annual, summer, and winter precipitation (AP, SP, WP) during the last century. Values of CAT, CWT and CST were from the slopes of linear regression of CR temperature data. Note that the same CRU data was used for some nearby treeline sites.

| Code     | Latitude (°) | Longitude (°) | Nearby treeline site | Time period |
|----------|--------------|---------------|----------------------|-------------|
| Zhangye  | 38.5         | 100.5         | QL1-5                | 1901-2017   |
| Delingha | 37.5         | 97.5          | DLH                  | 1901-2017   |
| Wulan    | 37.0         | 98.5          | WL1-2                | 1901-2017   |
| Nangqian | 32.0         | 96.5          | YS1                  | 1901-2017   |
| Yushu    | 36.5         | 97.5          | YS2                  | 1901-2017   |
| Dulan    | 36.0         | 98.0          | DL1                  | 1901-2017   |
| Suoxian  | 31.5         | 94.5          | SX                   | 1901-2017   |
| Maqin    | 34.5         | 99.5          | MQ                   | 1901-2017   |
| Henan    | 34.5         | 100.5         | HBS                  | 1901-2017   |
| Changdu  | 31.5         | 95.5          | CD1-6                | 1901-2017   |
| Aba      | 31.5         | 102.0         | AB1-2                | 1901-2017   |
| Kangding | 31.5         | 102.1         | KD1-2                | 1901-2017   |
| Basu     | 30           | 97.0          | BS                   | 1901-2017   |
| Ranwu    | 29.5         | 96.5          | RW1-3                | 1901-2017   |
| Linzhi   | 29.5         | 94.5          | LZ1-6                | 1901-2017   |
| Gongga   | 30.0         | 102.0         | GG1-6                | 1901-2017   |
| Deqin    | 28.5         | 99.0          | BM1-8                | 1901-2017   |
| MST      | 28.5         | 83.5          | MST1-2               | 1901-2017   |
| MA       | 28.5         | 84.0          | MA                   | 1901-2017   |
| JM       | 29.5         | 82.5          | JM                   | 1901-2017   |
| Humla    | 30.0         | 82.0          | HL                   | 1901-2017   |
| Langtang | 28.0         | 86.5          | LT1-2, EV1-2         | 1901-2017   |
| KCA      | 27.5         | 88.0          | KCA1-2               | 1901-2017   |
| SA       | 32.0         | 77.5          | SA1                  | 1901-2017   |

**Table S3** Definitions of the biotic variables and three terminologies used in this study. The explicit hypotheses were shown for biotic variables. The biotic variables included: height growth rate (HGR), tree recruitment (RE), vegetation TI (TI) and expansion potential (EP). To clarify the data analysis, treeline and tree species line was also included in this table.

| Variable or terminology | Definition                                                                                                                                          | Hypothesis                                                                                                   |
|-------------------------|-----------------------------------------------------------------------------------------------------------------------------------------------------|--------------------------------------------------------------------------------------------------------------|
| Treeline                | The uppermost elevation of trees (height >2m)                                                                                                       | No                                                                                                           |
| tree species line       | The uppermost elevation of tree individuals regardless of their height (e.g. height $\leq 0.50$ m)                                                  | No                                                                                                           |
| Treeline ecotone        | The transition zone between treeline and tree species line                                                                                          | No                                                                                                           |
| EP                      | The elevational difference between the current treeline and the current tree species line                                                           | The value of EP measured in the current time period remained relative constant under climate change          |
| TI                      | TI is calculated from the mean cover and height of dominant ground vegetation (e.g. shrub, grass) across the treeline ecotone at each treeline site | The value of TI measured in the current time period remained relative constant under climate change          |
| HGR                     | Annual growth rate for the tree individuals of 2 m                                                                                                  | Seedlings took the same amount of time to reach the height of 2 m under past and current climatic conditions |
| RE                      | The presence of tree seedlings (height $\leq 0.5$ m) and saplings (height >0.5 m and height < 2m) at the treeline                                   | No                                                                                                           |
